# Supplementary material for: Mapping paratopes of nanobodies using native mass spectrometry and ultraviolet photodissociation
Source: Royal Society of Chemistry journal article supplement (doi:10.1039/d2sc01536f), 2022-01-01
Supplement: d2sc01536f1.pdf [file d2sc01536f1.pdf]

## Nanobody Paratope Mapping using Native Mass Spectrometry and Ultraviolet Photodissociation

Luis A. Macias,<sup>a</sup> Xun Wang,<sup>b</sup> Bryan W. Davies,<sup>b</sup> Jennifer S. Brodbelt<sup>a\*</sup>

<sup>a</sup>Department of Chemistry, University of Texas at Austin, Austin, TX 78712, USA

<sup>b</sup>Department of Molecular Biosciences, University of Texas at Austin, Austin, TX 78712, USA

Correspondence: [jbrodbelt@cm.utexas.edu](mailto:jbrodbelt@cm.utexas.edu)

### Supporting Information

#### Table of Contents

|   | Content                                                                                | Page no. |
|---|----------------------------------------------------------------------------------------|----------|
| 1 | Figure S1. Native MS1 spectra of free proteins                                         | S2       |
| 2 | Figure S2. UVPD mass spectra of free nanobodies                                        | S3       |
| 3 | Figure S3. Free and bound nanobody fragment maps                                       | S4       |
| 4 | Figure S4. Gnb UVPD fragment heatmap                                                   | S5       |
| 5 | Figure S5. Rnb UVPD fragment heatmap                                                   | S6       |
| 6 | Figure S6. Anb UVPD fragment heatmap                                                   | S7       |
| 7 | Figure S7. nb structure mapped with UVPD enhancement                                   | S8       |
|   | Figure S8. CDR regions mapped onto crystal structures of (A) Gnb, (B) Rnb, and (C) Anb | S9       |
| 8 | Figure S9. Charge site analysis of RNnb                                                | S10      |
| 9 | Figure S10. Charge site analysis of Anb                                                | S11      |

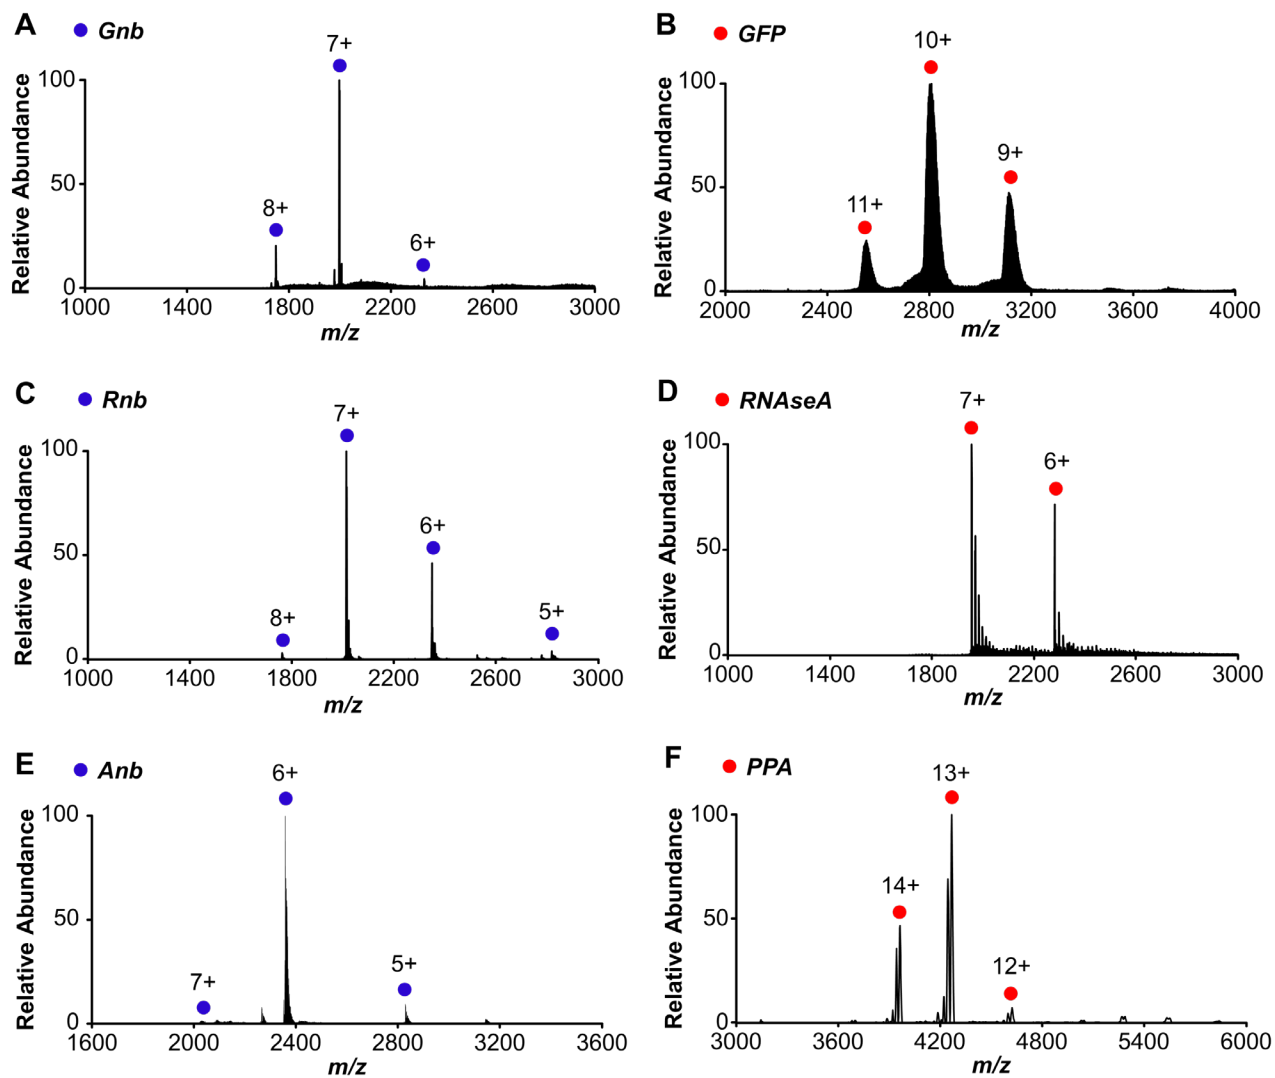

**Figure S1.** Native MS1 mass spectra of apo nanobodies and the apo antigens. (A) free Gnb and (B) free GFP; (C) free Rnb and (D) free RNaseA; (E) free Anb and (B) free PPA. Each solution contained 30  $\mu$ M protein in 100 mM ammonium acetate.

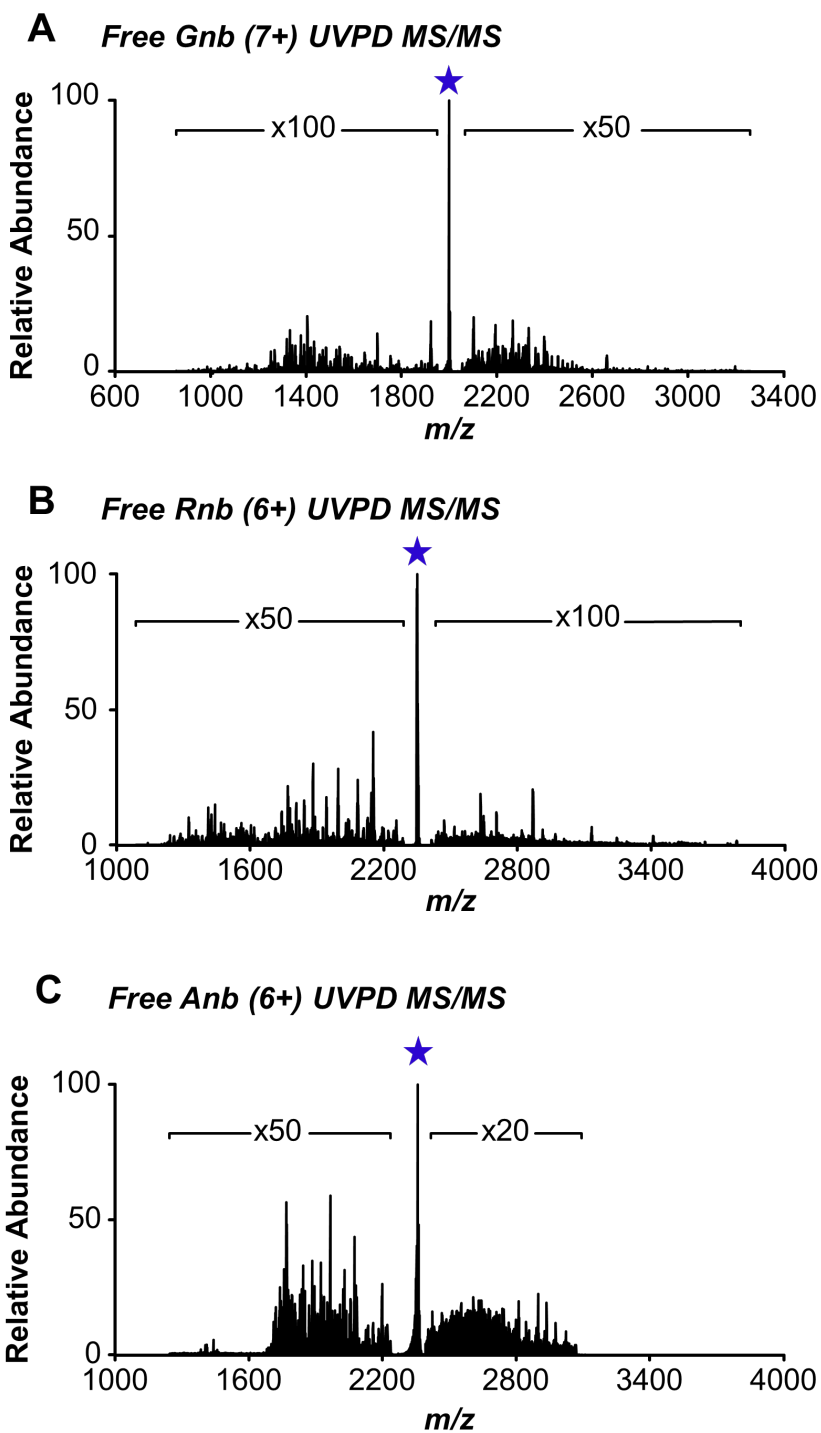

**Figure S2.** UVPD (1 pulse set to 3 mJ) mass spectra of each of the three nanobodies. (A) free Gnb (7+), (B) free Rnb (6+), and (C) free Anb (6+). Regions of interest with low abundance sequence fragments are magnified. Precursor ions are demarcated with a star.

### A Free Gnb (7+, 14.0 kDa)

N A|Q|V|Q L|V|E|S G G|A|L|V|Q|P|G|G|S|L|R|L|S|C|A|A 25  
26|S|G|F P|V|N|R|Y|S|M|R|W|Y|R|Q|A|P|G|K|E|R|E W|V|A 50  
51|G|M|S|S|A|G|D|R|S|S Y|E|D|S V|K G R|F|T I S R D|D 75  
76 A|R|N T V|Y|L|Q|M|N|S L K|P E D T|A|V|Y|Y|C|N|V|N 100  
101|V|G|F|E|Y|W|G|Q|G|T|Q|V|T|V|S|S|K|L|E H|H H|H H H C

### Gnb•GFP (13+, 41.8 kDa)

N A|Q V|Q L V E|S|G|G|A|L|V|Q|P|G|G|S|L|R|L|S|C|A|A 25  
26|S|G|F P|V|N|R Y S M|R|W|Y|R|Q|A|P G K E R|E W|V|A 50  
51 G M|S S A|G D R S S Y|E D S V K G R|F|T I S R D D 75  
76 A R|N|T V|Y|L|Q|M|N S L|K|P|E|D|T|A|V Y|Y|C|N|V|N 100  
101|V|G|F|E|Y|W|G|Q|G|T|Q|V|T|V|S|S|K|L|E|H|H|H|H|H H C

### B Free Rnb (6+, 14.1 kDa)

N A|Q|V|Q L V E S G G G L|V|Q|A|G|G|S|L|R|L|S|C|A|A 25  
26|S|G|Y|A|Y|T|Y|I|Y|M|G|W|F|R Q|A P|G|K|E|R|E G|V|A 50  
51|A|M|D|S|G|G|G|G|T|L|Y|A|D|S|V K G R|F|T I S R D K 75  
76 G K N|T V Y L Q M D|S L K|P E D|T A|T|Y|Y|C|A|A|G 100  
101|G|Y|E|L|R D|R|T|Y|G|Q|W|G|Q|G|T|Q|V|T|V|S|S L E H 125  
126 H H H|H|H C

### Rnb•RNAseA (11+, 27.8 kDa)

N A|Q|V|Q L V E|S|G G G L V|Q|A|G|G|S|L|R|L|S|C|A|A 25  
26|S|G|Y|A Y|T|Y|I Y M|G|W F|R|Q|A P|G K E|R|E G|V|A 50  
51|A|M|D|S G G G|G|T|L Y A D|S V K G R|F|T I S R D K 75  
76|G K N T V Y L Q M D S L K|P|E|D|T|A|T Y|Y|C|A|A|G 100  
101|G|Y|E|L|R D|R|T|Y|G|Q|W|G|Q|G|T|Q|V|T|V|S|S|L|E|H 125  
126|H|H H|H H C

### C Free Anb (6+, 14.1 kDa)

N A Q V|Q L|L|V|E|S|G G G S V|Q|A|G|G S|L|S|L|S|C|A|A 25  
26|S T Y|T D|T V G W|F R|Q|A P|G|K|E R|E|G|V A A I|Y 50  
51|R|R|T|G|Y|T|Y|S|A|D|S|V|K|G|R|F|T L S Q D|N|N|K|N 75  
76 T V Y|L|Q M N|S L K|P E D T G I Y|Y|C|A|T|G|N|S|V 100  
101|R L L A|S W|E|G|Y|F|Y|W|G|Q|G|T|Q V|T|V|S|S|L|E|H H 125  
126 H|H H|H C

### Anb•PPA (15+, 69.3 kDa)

N A Q V|Q L|L V E S|G G G S V|Q|A|G|G S|L|S|L|S|C|A|A 25  
26|S T Y|T D T V|G|W|F R|Q|A P|G|K E|R|E|G|V A A I|Y 50  
51 R R|T G Y|T Y S|A D S V K G R|F T L S Q D|N N K N 75  
76 T V Y L Q M N S L K|P E D T G I Y Y|C|A|T|G|N|S|V 100  
101 R L A S W|E|G|Y|F|Y|W|G Q|G|T|Q|V|T|V|S|S L E H|H 125  
126|H|H|H|H C

**Figure S3.** Backbone cleavage maps for apo and antigen-bound (A) Gnb, (B) Rnb, and (C) Anb, displaying backbone cleavages that result in assignable sequence ions detected at least twice across five replicates. Backbone cleavages are demarcated by colored flags. Blue flags indicate *b/y* fragments, green flags indicate *a/x* fragments, and red flags indicate *c/z* fragments. Precursor charge and mass are indicated in parentheses.

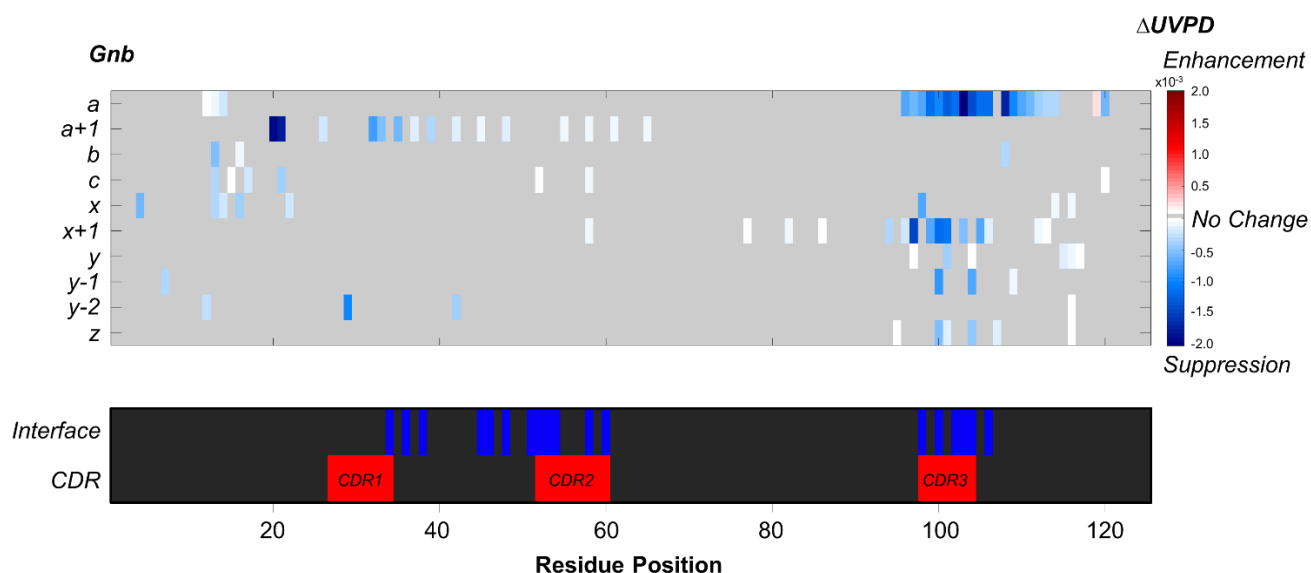

**Figure S4.** Suppression and enhancement of backbone cleavage sites based on abundances of UVPD fragment ions induced for Gnb by antigen binding. Heat plots display significant differences ( $p < 0.05$ ,  $n = 5$ ) for the abundances of each UVPD fragment type between the free and bound states. Blue and red indicate suppression and enhancement of fragment abundances, respectively, for the nanobody upon complexation. Positions that display no significant change are shown in grey. Color maps highlighting interface residues and CDRs are also included.  $\Delta UVPD$  values correspond to the fragment abundance per residue for the bound state minus the fragment abundance per residue for the free state.

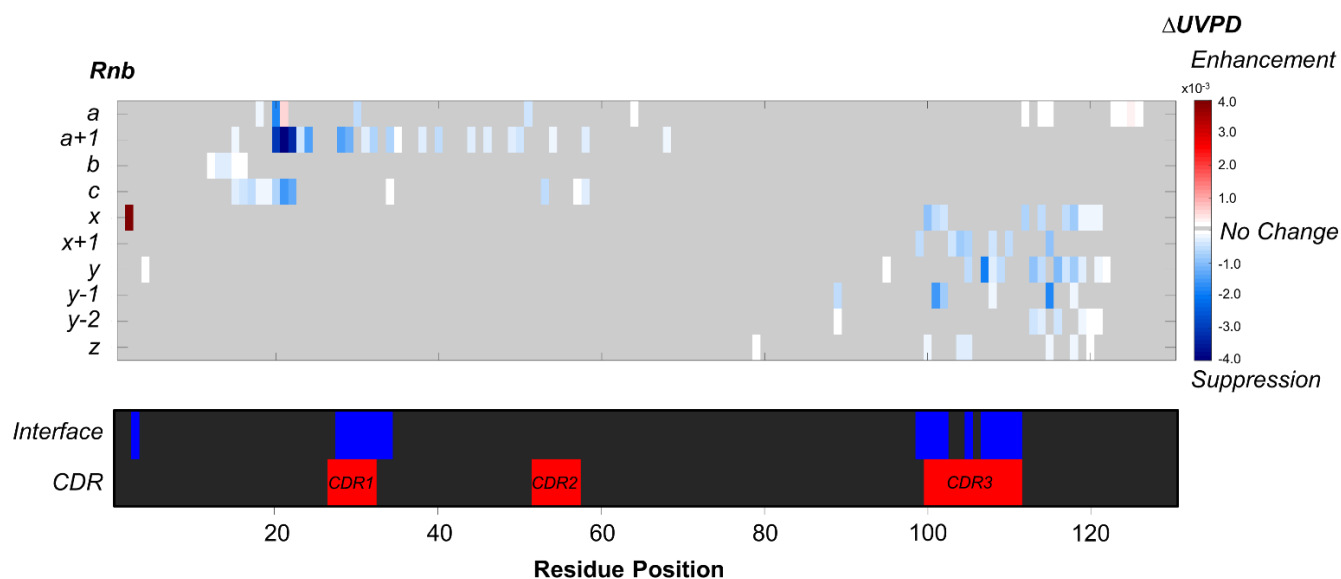

**Figure S5.** Suppression and enhancement of backbone cleavage sites based on abundances of UVPD fragment ions induced for Rnb by antigen binding. Heat plots display significant differences ( $p < 0.05$ ,  $n = 5$ ) for the abundances of each UVPD fragment type between the free and bound states. Blue and red indicate suppression and enhancement of fragment abundances, respectively, for the nanobody upon complexation. Positions that display no significant change are shown in grey. Color maps highlighting interface residues and CDRs are also included.  $\Delta\text{UVPD}$  values correspond to the fragment abundance per residue for the bound state minus the fragment abundance per residue for the free state.

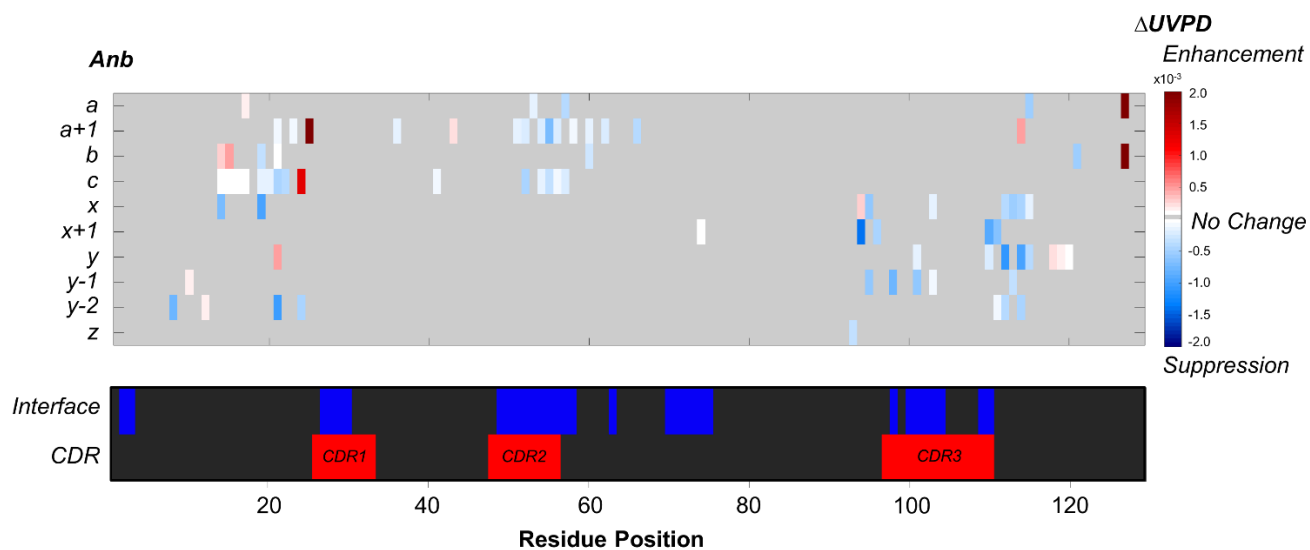

**Figure S6.** Suppression and enhancement of backbone cleavage sites based on abundances of UVPD fragment ions induced for Anb by antigen binding. Heat plots display significant differences ( $p < 0.05$ ,  $n = 5$ ) for the abundances of each UVPD fragment type between the free and bound states. Blue and red indicate suppression and enhancement of fragment abundances, respectively, for the nanobody upon complexation. Positions that display no significant change are shown in grey. Color maps highlighting interface residues and CDRs are also included.  $\Delta UVPD$  values correspond to the fragment abundance per residue for the bound state minus the fragment abundance per residue for the free state.

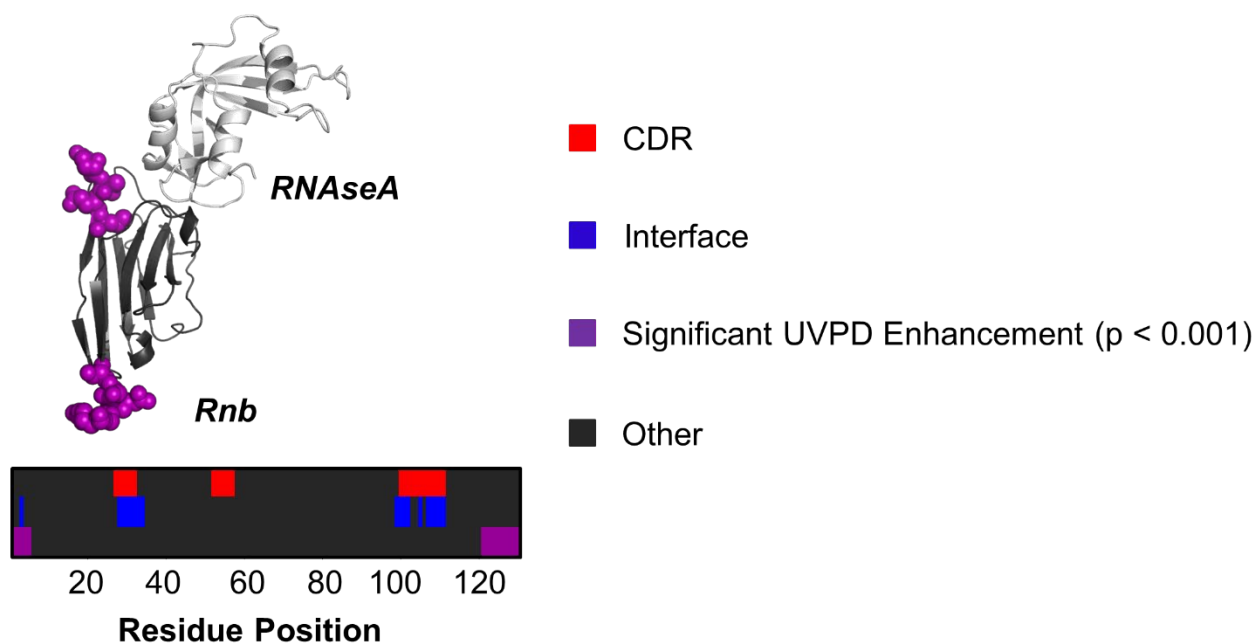

**Figure S7.** Sections displaying significant UVPD enhancement upon complexation ( $p < 0.001$ ,  $n = 0.05$ ) are mapped onto the crystal structure of Rnb•RNAseA as purple spheres. Residue positions displaying significant UVPD enhancement, interface residues, and CDR regions are shown as color maps.

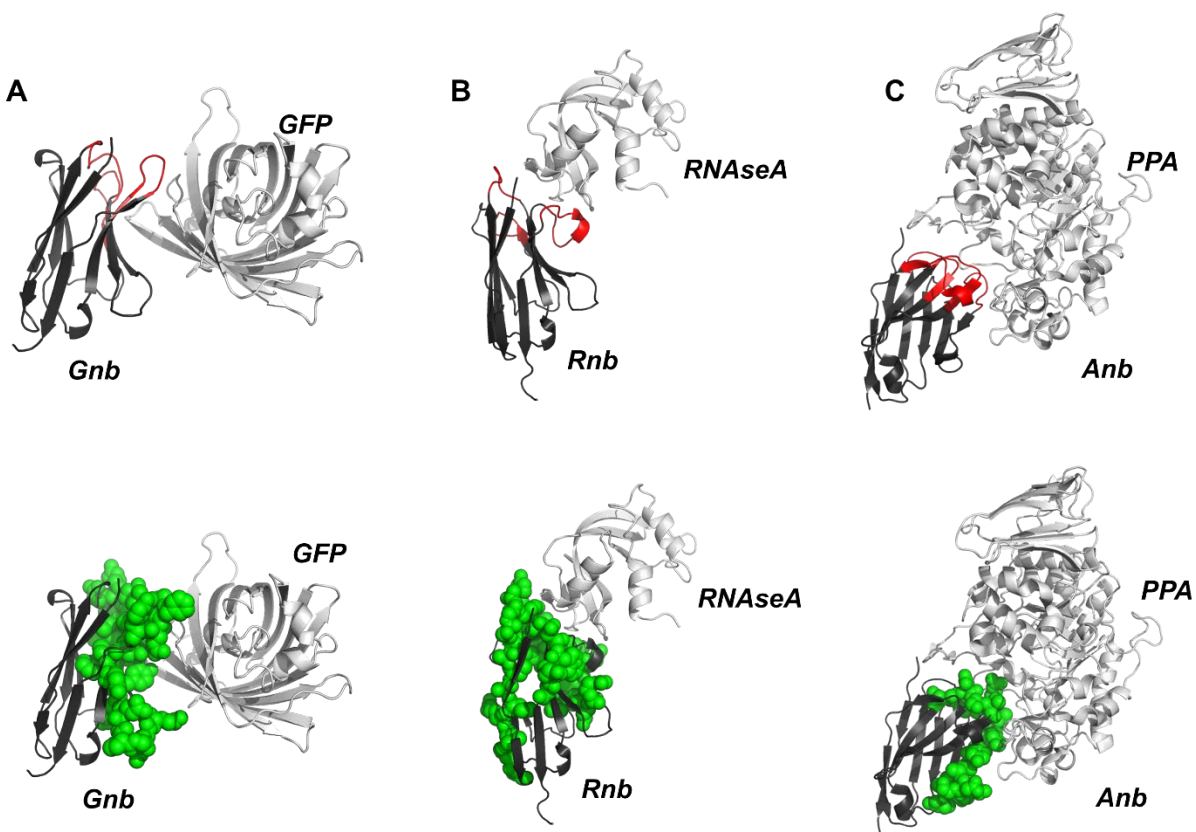

**Figure S8.** CDR regions in red are mapped onto crystal structures of (A) Gnb, (B) Rnb, and (C) Anb. The UVPD backbone cleavage maps from Figure 3 are shown in the lower portion of the figure to facilitate comparisons.

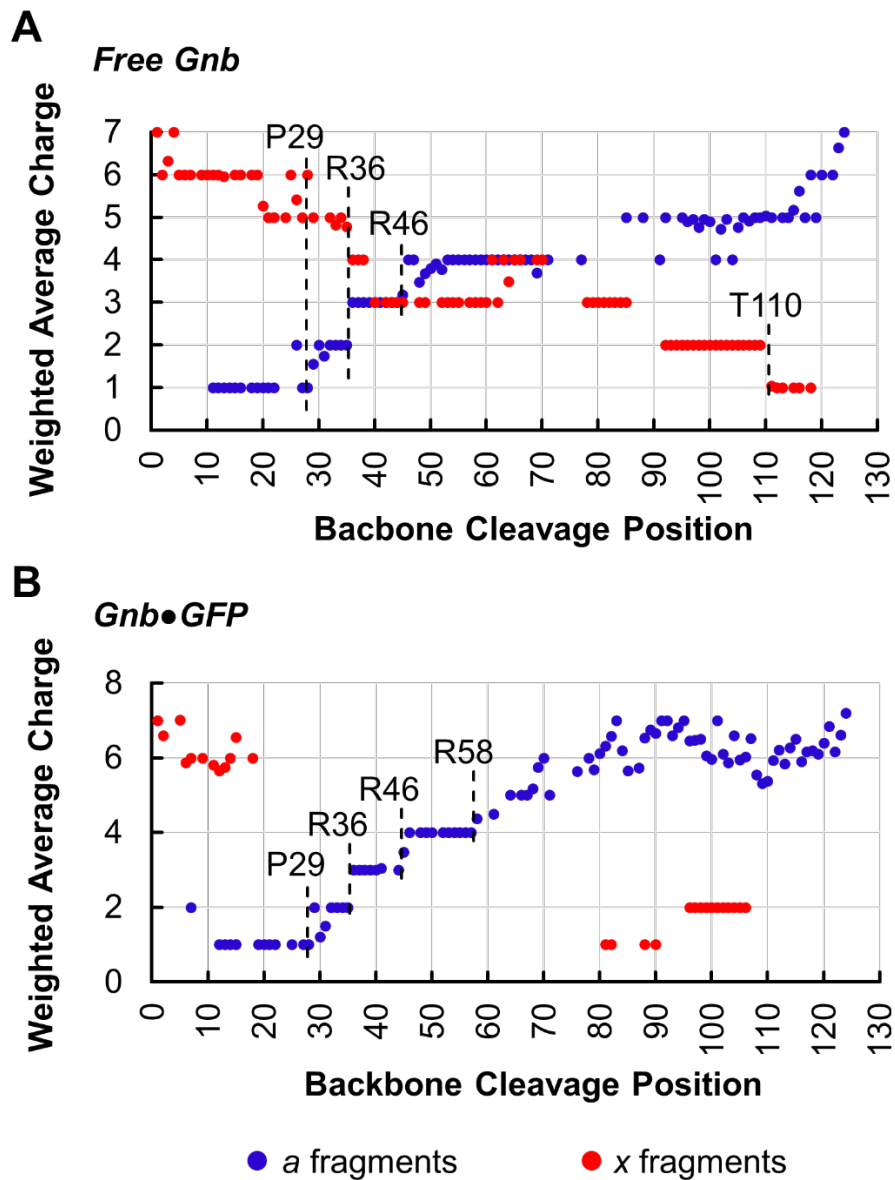

**Figure S9.** Weighted average charge of *a*-type and *x*-type fragment ions attributed to GFnb produced by UVPD of (A) free GFnb (7+) and (B) GFnb•GFP (13+) delineated based on the backbone cleavage site along the sequence of the nanobody.

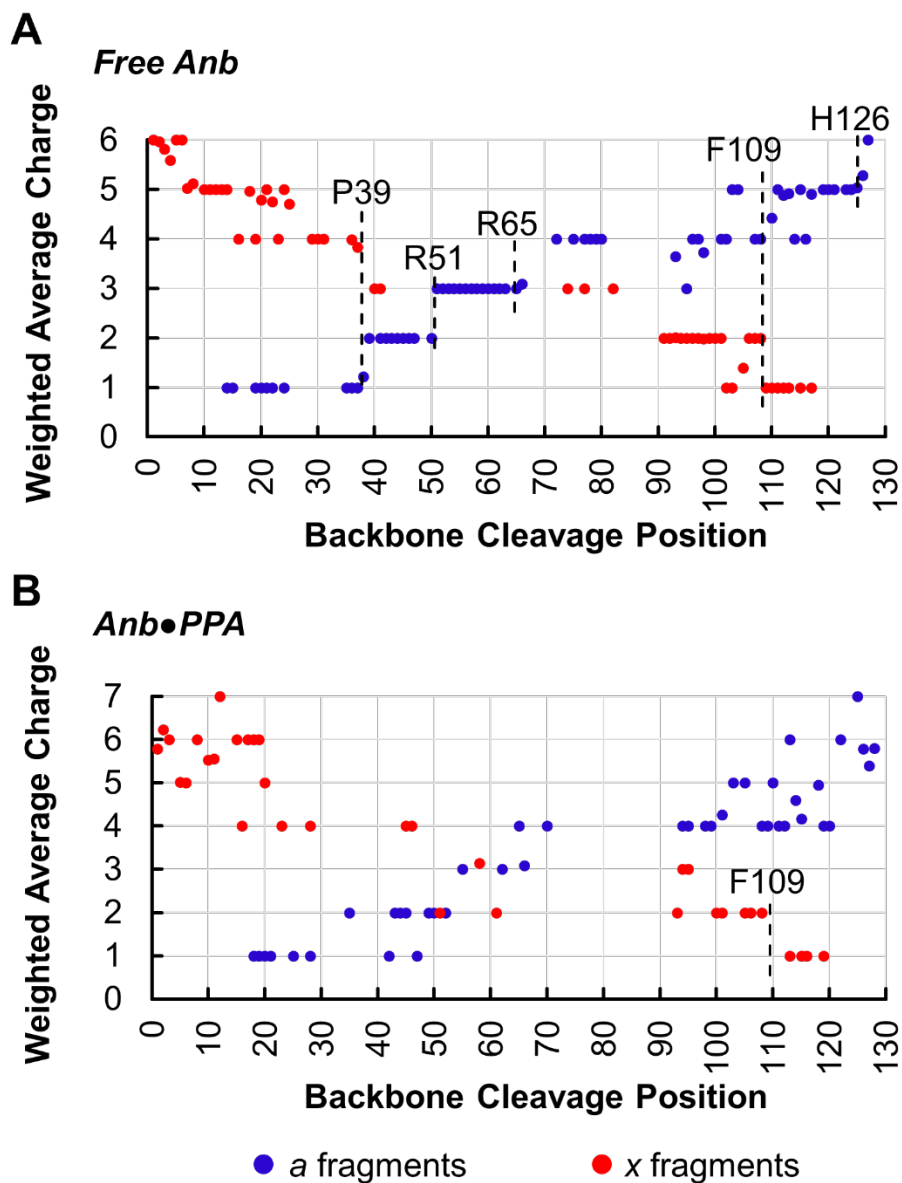

**Figure S10.** Weighted average charge of *a*-type and *x*-type fragment ions attributed to Anb produced by UVPD of (A) free Anb (6+) and (B) Anb•PPA (15+), delineated based on the backbone cleavage site along the sequence of the nanobody.
